# Supplementary material
Source: PubMed Central journal article supplement (PMC7105934)
Supplement: NIHMS1574506-supplement-Supplementary.pdf [file NIHMS1574506-supplement-Supplementary.pdf]

# Computational Insights into the Binding of IN17

## Inhibitors to MELK

Matthew Harger<sup>1</sup>, Ju-Hyeon Lee<sup>2</sup>, Brandon Walker<sup>1</sup>, Juliana M

Taliaferro<sup>2</sup> Ramakrishna Edupuganti<sup>2</sup>, Kevin N. Dalby<sup>2</sup>, Pengyu

Ren<sup>1</sup>

1 Department of Biomedical Engineering, The University of Texas at Austin, Austin, Texas, 78712, United States

2 Division of Chemical Biology and Medicinal Chemistry, University of Texas at Austin, Austin, TX 78712, United States

### Supplementary Information

Table S1a:

Vdw-lambda/ele-lambda, and group restraints used for binding phase simulations

| Vdw-lambda | Ele-lambda | Group restraint |
|------------|------------|-----------------|
| 1.0        | 1.0        | 0.0             |
| 1.0        | 0.95       | 1.0             |
| 1.0        | 0.9        | 2.0             |
| 1.0        | 0.8        | 4.0             |
| 1.0        | 0.7        | 6.0             |
| 1.0        | 0.6        | 8.0             |
| 1.0        | 0.5        | 10.0            |
| 1.0        | 0.4        | 12.0            |
| 1.0        | 0.3        | 14.0            |
| 1.0        | 0.2        | 15.0            |
| 1.0        | 0.1        | 15.0            |
| 1.0        | 0.0        | 15.0            |
| 0.95       | 0.0        | 15.0            |
| 0.9        | 0.0        | 15.0            |
| 0.85       | 0.0        | 15.0            |

|      |     |      |
|------|-----|------|
| 0.8  | 0.0 | 15.0 |
| 0.75 | 0.0 | 15.0 |
| 0.70 | 0.0 | 15.0 |
| 0.65 | 0.0 | 15.0 |
| 0.63 | 0.0 | 15.0 |
| 0.61 | 0.0 | 15.0 |
| 0.59 | 0.0 | 15.0 |
| 0.57 | 0.0 | 15.0 |
| 0.55 | 0.0 | 15.0 |
| 0.5  | 0.0 | 15.0 |
| 0.4  | 0.0 | 15.0 |
| 0.0  | 0.0 | 15.0 |

Table S1b:

Vdw-lambda/ele-lambda, group restraint, and torsion restrains used for solvation phase simulations

| Vdw-lambda | Ele-lambda | Torsion restraint |
|------------|------------|-------------------|
| 1.0        | 1.0        | 0.0               |
| 1.0        | 0.9        | 0.0               |
| 1.0        | 0.8        | 0.0               |
| 1.0        | 0.7        | 0.0               |
| 1.0        | 0.6        | 0.0               |
| 1.0        | 0.5        | 0.0               |
| 1.0        | 0.4        | 0.0               |
| 1.0        | 0.3        | 0.0               |
| 1.0        | 0.2        | 0.0               |
| 1.0        | 0.1        | 0.0               |
| 1.0        | 0.0        | 0.0               |
| 0.9        | 0.0        | 0.01              |
| 0.8        | 0.0        | 0.02              |
| 0.75       | 0.0        | 0.03              |
| 0.7        | 0.0        | 0.04              |
| 0.65       | 0.0        | 0.05              |
| 0.62       | 0.0        | 0.06              |
| 0.6        | 0.0        | 0.07              |
| 0.55       | 0.0        | 0.08              |
| 0.5        | 0.0        | 0.09              |
| 0.4        | 0.0        | 0.1               |
| 0.0        | 0.0        | 0.1               |

|  | binding enthalpy | binding enthalpy error | binding entropy (TΔS) | solvation enthalpy | solvation enthalpy error | solvation entropy TΔS | ΔH | TΔS |
|--|------------------|------------------------|-----------------------|--------------------|--------------------------|-----------------------|----|-----|
|--|------------------|------------------------|-----------------------|--------------------|--------------------------|-----------------------|----|-----|

|            |        |      |        |              |      |        |        |        |
|------------|--------|------|--------|--------------|------|--------|--------|--------|
| 16         | -149.8 | 32.8 | -76.4  | <b>-77.4</b> | 27.1 | -22.8  | -72.3  | -53.6  |
| 22         | -150.8 | 43.6 | -73.7  | -34.8        | 31.3 | 27.6   | -116.0 | -101.3 |
| 25         | -127.7 | 37.1 | -44.6  | -100.5       | 28.8 | -34.5  | -27.2  | -10.1  |
| <b>18a</b> | -131.7 | 36.9 | -61.3  | -131.1       | 28.9 | -78.2  | -0.6   | 16.9   |
| 18b        | -121.4 | 36.8 | -41.3  | -66.7        | 29.5 | -4.9   | -54.7  | -36.3  |
| 18d        | 28.5   | 80.8 | -110.3 | -123.8       | 29.1 | 60.0   | 152.2  | -170.4 |
| <b>18e</b> | -120.8 | 80.6 | -40.1  | -172.2       | 29   | -111.5 | 51.5   | 71.4   |
| 18g        | -106.1 | 35.6 | -24.7  | -47.0        | 28.4 | 17.0   | -59.1  | -41.6  |
| 18i        | -85.9  | 36.6 | -8.3   | -128.5       | 30.6 | -69.6  | 42.6   | 61.3   |
| 18p        | -273.6 | 36.4 | -203.8 | -84.1        | 28.5 | -32.9  | -189.6 | -170.9 |
| IN17       | -94.9  | 32.9 | -23.3  | -115.1       | 15.1 | -63.1  | 20.2   | 39.8   |

Table S2: Calculated binding and solvation entropy and enthalpy

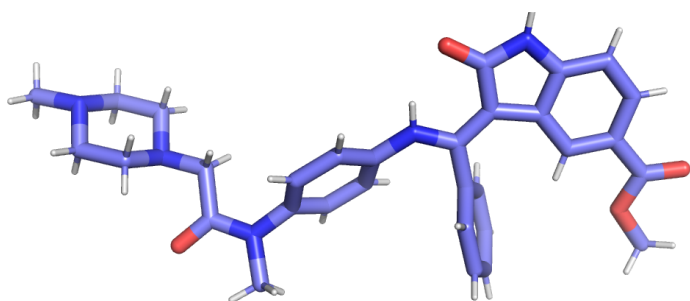

Figure S1: Solvent phase crystal structure of IN17
